# Supplementary material for: Hemagglutinin-esterase-fusion (HEF) protein of influenza C virus
Source: PubMed Central journal article supplement (PMC4707155; doi:10.1007/s13238-015-0193-x), 2015-07-28
Supplement: 13238_2015_193_MOESM1_ESM.pdf [file 13238_2015_193_MOESM1_ESM.pdf]

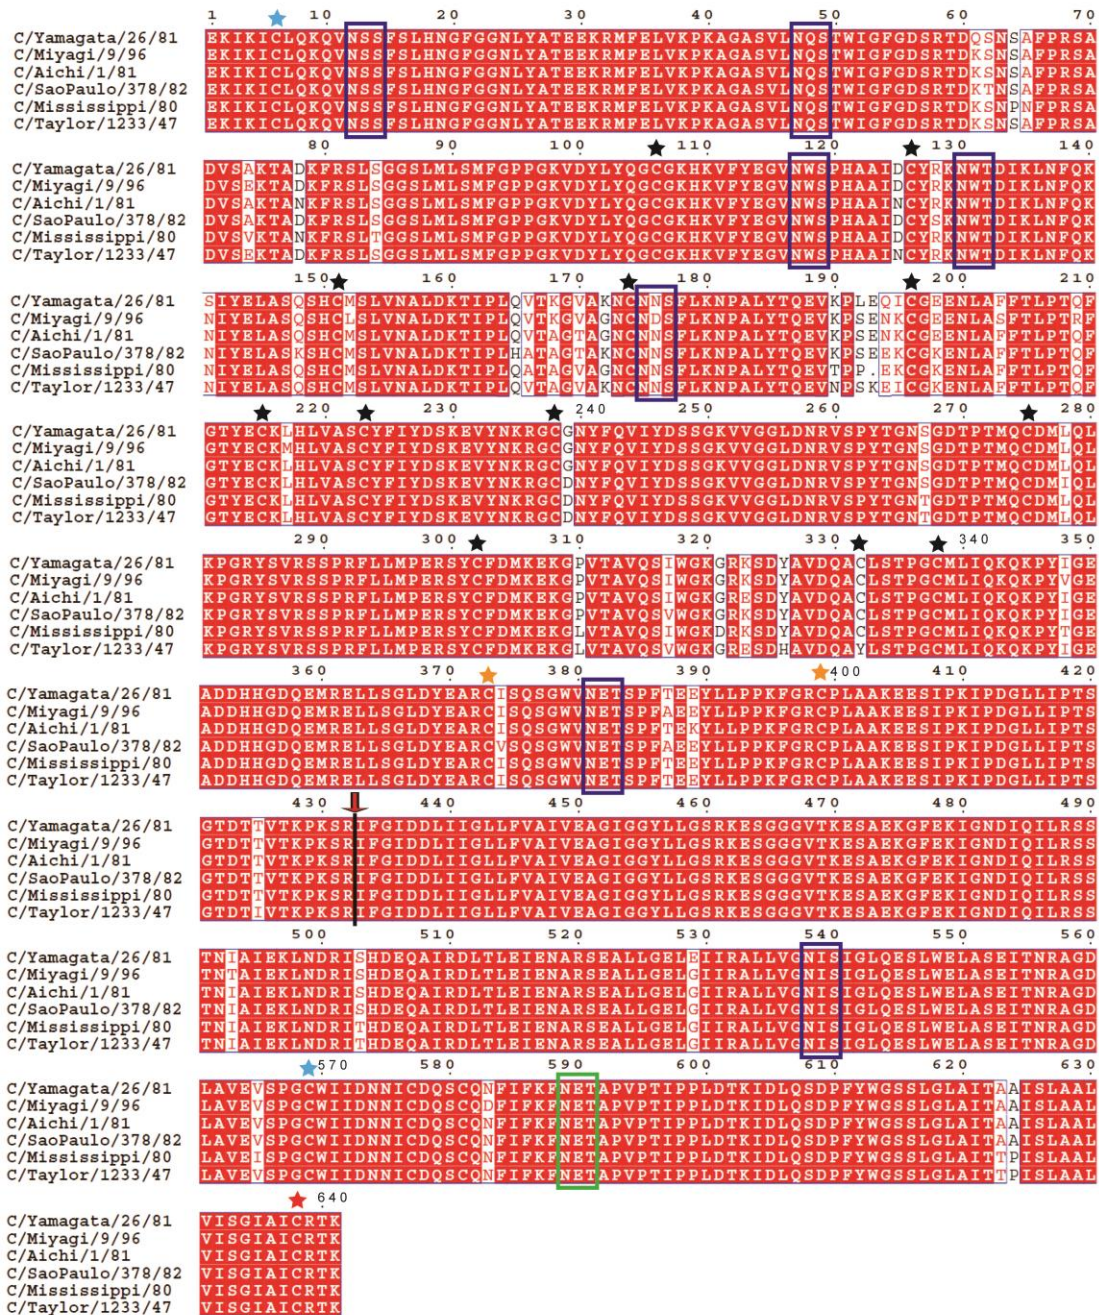

- ★ Cysteine form inter-chain disulfide linkage
- ★ Cysteines form inner-HEF1 disulfide linkage
- ★ Free Cysteines
- ★ S-acetylation Cysteine
- ↓ HEF1-HEF2 cleavage site
- N-Glycosylation sites
- N-Glycosylation motif which is not glycosylated

**Supplementary table 1. Alignment of HEF proteins from six lineages of influenza C viruses.** The cleavage site between HEF1 and HEF, cysteines and N-glycosylation motifs are highlighted as indicated.
